# Supplementary material for: Functional analyses of genetic pathways controlling petal specification in poppy
Source: Oxford University Press journal article supplement (doi:10.1242/dev.013136), 2007-10-24
Supplement: dev013136tables1-2.pdf [file dev013136tables1-2.pdf]

**Table S1. Summary of VIGS lines generated for each construct**

|                       | vigsAP3-1 | vigsAP3-2 | vigsAP3-D | vigsPI-1 | vigsPI-2 | vigsPI-D |
|-----------------------|-----------|-----------|-----------|----------|----------|----------|
| Phenotype             | 27        | 19        | 13        | 12       | 0        | 4        |
| Petal transformation  | 27        | 0         | 13        | 12       | 0        | 4        |
| Stamen transformation | 0         | 19        | 13        | 12       | 0        | 4        |

Approximately 500 plants were screened for each construct during the course of 30 independent VIGS experiments; the numbers of plants with visible phenotypes are indicated.

**Table S2. Genes used for phylogenetic analyses**

| Gene (GenBank accession number)                                                                                                                                                                | Species                           |
|------------------------------------------------------------------------------------------------------------------------------------------------------------------------------------------------|-----------------------------------|
| <i>AP3</i> (AAL49893); <i>PI</i> (BAA06465)                                                                                                                                                    | <i>Arabidopsis thaliana</i>       |
| <i>PeaPI</i> (AAW29099)                                                                                                                                                                        | <i>Pisum sativum</i>              |
| <i>DEF</i> (CAA44629); <i>GLO</i> (CAA48725)                                                                                                                                                   | <i>Antirrhinum majus</i>          |
| <i>PhDEF</i> (X69946); <i>PhTM6</i> (AAS46017); <i>PhFBP-1</i> (M91190), <i>PhMADS-2</i> (AY370521)                                                                                            | <i>Petunia hybrida</i>            |
| <i>TAP3</i> (ABG73412); <i>TM6</i> (ABG48621); <i>TPI</i> (ABG73411)                                                                                                                           | <i>Solanum lycopersicon</i>       |
| <i>PloAP3-1</i> (AAO26529); <i>PloAP3-2</i> (AAO26530)                                                                                                                                         | <i>Platanus occidentalis</i>      |
| <i>PpAP3-1</i> (ABF56135); <i>PpAP3-2</i> (ABF56136); <i>PpAP3-3</i> (ABF56137)                                                                                                                | <i>Pachysandra procumbens</i>     |
| <i>PtAP3-1</i> (AAC42585); <i>PtAP3-2</i> (AAC42586)                                                                                                                                           | <i>Pachysandra terminalis</i>     |
| <i>TraAP3</i> (DQ453774)                                                                                                                                                                       | <i>Trochodendron aralioides</i>   |
| <i>MdAP3-1</i> (AAR87670); <i>MdAP3-2</i> (AAR87671); <i>MdAP3-3</i> (AAR87672); <i>MdPI</i> (AAR87673)                                                                                        | <i>Meliosma dilleniifolia</i>     |
| <i>NnAP3</i> (ABE11602)                                                                                                                                                                        | <i>Nelumbo nucifera</i>           |
| <i>PnAP3-1</i> (AAC42588); <i>PnAP3-2</i> (AAC42589); <i>PnPI-1</i> (AAC42570), <i>PnPI-2</i> (AAC42571)                                                                                       | <i>Papaver nudicaule</i>          |
| <i>PapsAP3-1</i> (EF071992); <i>PapsAP3-2</i> (EF071993); <i>PapsPI-1</i> (EF071994), <i>PapsPI-2</i> (EF071995)                                                                               | <i>Papaver somniferum</i>         |
| <i>E5caDEF-1</i> ; <i>E5caDEF-2</i> ; <i>E5caGLO</i>                                                                                                                                           | <i>Eschscholzia californica</i>   |
| <i>ScAP3</i> (AAD31696); <i>ScPI</i> (AAD31699)                                                                                                                                                | <i>Sanguinaria canadensis</i>     |
| <i>DeAP3</i> (AAC42590); <i>DePI</i> (AAC42572)                                                                                                                                                | <i>Dicentra eximia</i>            |
| <i>AkqAP3-1</i> (AAT46097); <i>AkqAP3-2</i> (ABC02398); <i>AkqPI</i> (AAT46101)                                                                                                                | <i>Akebia quinata</i>             |
| <i>AqaAP3-1</i> (AAO26497); <i>AqaAP3-2</i> (AAO26498); <i>AqaAP3-3</i> (AAO26499); <i>AqaPI</i> (AAO26500)                                                                                    | <i>Aquilegia alpina</i>           |
| <i>AnnAP3-1</i> (AAO26489); <i>AnnAP3-2</i> (AAO26490); <i>AnnAP3-3</i> (AAO26491); <i>AnnPI-1</i> (AAO26493); <i>AnnPI-2</i> (AAO26495)                                                       | <i>Anemone nemerosa</i>           |
| <i>CliAP3-1</i> (AAO26518); <i>CliAP3-2</i> (AAO26519); <i>CliPI-1</i> (AAO26520), <i>CliPI-2</i> (AAO26521)                                                                                   | <i>Clematis integrifolia</i>      |
| <i>CirAP3-1</i> (AAO26510); <i>CirAP3-2</i> (AAO26511); <i>CirAP3-3</i> (AAO26512); <i>CirPI-1</i> (AAO26513); <i>CirPI-2</i> (AAO26514)                                                       | <i>Cimicifuga racemosa</i>        |
| <i>DaPI</i> (AAC42577)                                                                                                                                                                         | <i>Delphinium ajacis</i>          |
| <i>HoAP3-1</i> (AAO26522); <i>HoAP3-2</i> (AAO26523); <i>HoAP3-3a</i> (AAO26524); <i>HoAP3-3b</i> (AAO26525); <i>HoPI-1</i> (AAO26526), <i>HoPI-2</i> (AAO26527), <i>HoPI-3</i> (AAO26528)     | <i>Helleborus orientalis</i>      |
| <i>RbAP3-1</i> (AAC42591); <i>RbAP3-2</i> (AAD31697); <i>RbPI-1</i> (AAC42574); <i>RbPI-2</i> (AAC42575)                                                                                       | <i>Ranunculus bulbosus</i>        |
| <i>RfAP3-1</i> (AAC42569); <i>RfAP3-2</i> (AAD31698); <i>RfAP3-3</i> (AAO26531); <i>RfPI-1</i> (AAC42573); <i>RfPI-2</i> (AAD31700)                                                            | <i>Ranunculus ficaria</i>         |
| <i>ThdAP3-1</i> (AAW78033); <i>ThdAP3-2a</i> (AAW78034); <i>ThdAP3-2b</i> (AAW78035); <i>ThdPI-1</i> (AAW78031), <i>ThdPI-2</i> (AAW78032)                                                     | <i>Thalictrum dioicum</i>         |
| <i>ThtAP3-1</i> (AAO26534); <i>ThtAP3-2a</i> (AAO26535); <i>ThtAP3-2b</i> (AAO26536); <i>ThtPI</i> (AAO26537)                                                                                  | <i>Thalictrum thalictroides</i>   |
| <i>TrcAP3</i> (AY162904)                                                                                                                                                                       | <i>Trautvetteria carolinensis</i> |
| <i>TriAP3-1</i> (AAO26538); <i>TriAP3-2</i> (AAO26540); <i>TriAP3-3</i> (AAO26542); <i>TriPI-1</i> (AAO26544), <i>TriPI-2</i> (AAO26546), <i>TriPI-3</i> (AAO26548), <i>TriPI-4</i> (AAO26550) | <i>Trollius laxus</i>             |
| <i>BgAP3-1</i> (AAO26505); <i>BgAP3-2</i> (AAO26506); <i>BgPI-1</i> (AAO26508), <i>BgPI-2</i> (AAO26509)                                                                                       | <i>Berberis gilgiana</i>          |
| <i>ZmGLO-1</i> (CAC33848), <i>ZmGLO-2</i> (CAC33849), <i>ZmGLO-3</i> (CAC33850)                                                                                                                | <i>Zea mays</i>                   |
| <i>OsMADS-2</i> (Q40702), <i>OsMADS-4</i> (Q40703)                                                                                                                                             | <i>Oryza sativa</i>               |
| <i>TgDEFA</i> (AB094965); <i>TgDEFB</i> (AB094966)                                                                                                                                             | <i>Tulipa gesneriana</i>          |
| <i>TacAP3</i> (AAF73935); <i>TacPI</i> (AAF73942)                                                                                                                                              | <i>Tacca chantieri</i>            |
| <i>ChsAP3</i> (AAF73930); <i>ChsPI</i> (AAF73939)                                                                                                                                              | <i>Chloranthus spicatus</i>       |
| <i>MfAP3</i> (AAC42592); <i>MfPI-1</i> (AAC42578)                                                                                                                                              | <i>Michelia figo</i>              |
| <i>ArePI</i> (AAR87680)                                                                                                                                                                        | <i>Aristolochia eriantha</i>      |
| <i>AmAP3</i> (AAV65053)                                                                                                                                                                        | <i>Aristolochia manshuriensis</i> |
| <i>AePI</i> (AAF73936)                                                                                                                                                                         | <i>Asarum europaeum</i>           |
| <i>SahPI</i> (AAR87679)                                                                                                                                                                        | <i>Saruma henryii</i>             |
| <i>NymAP3</i> (AAR87709)                                                                                                                                                                       | <i>Nymphaea</i> sp.               |
