# Supplementary figures and images for: Functional analyses of genetic pathways controlling petal specification in poppy
Source: Oxford University Press journal article supplement (doi:10.1242/dev.013136), 2007-10-24

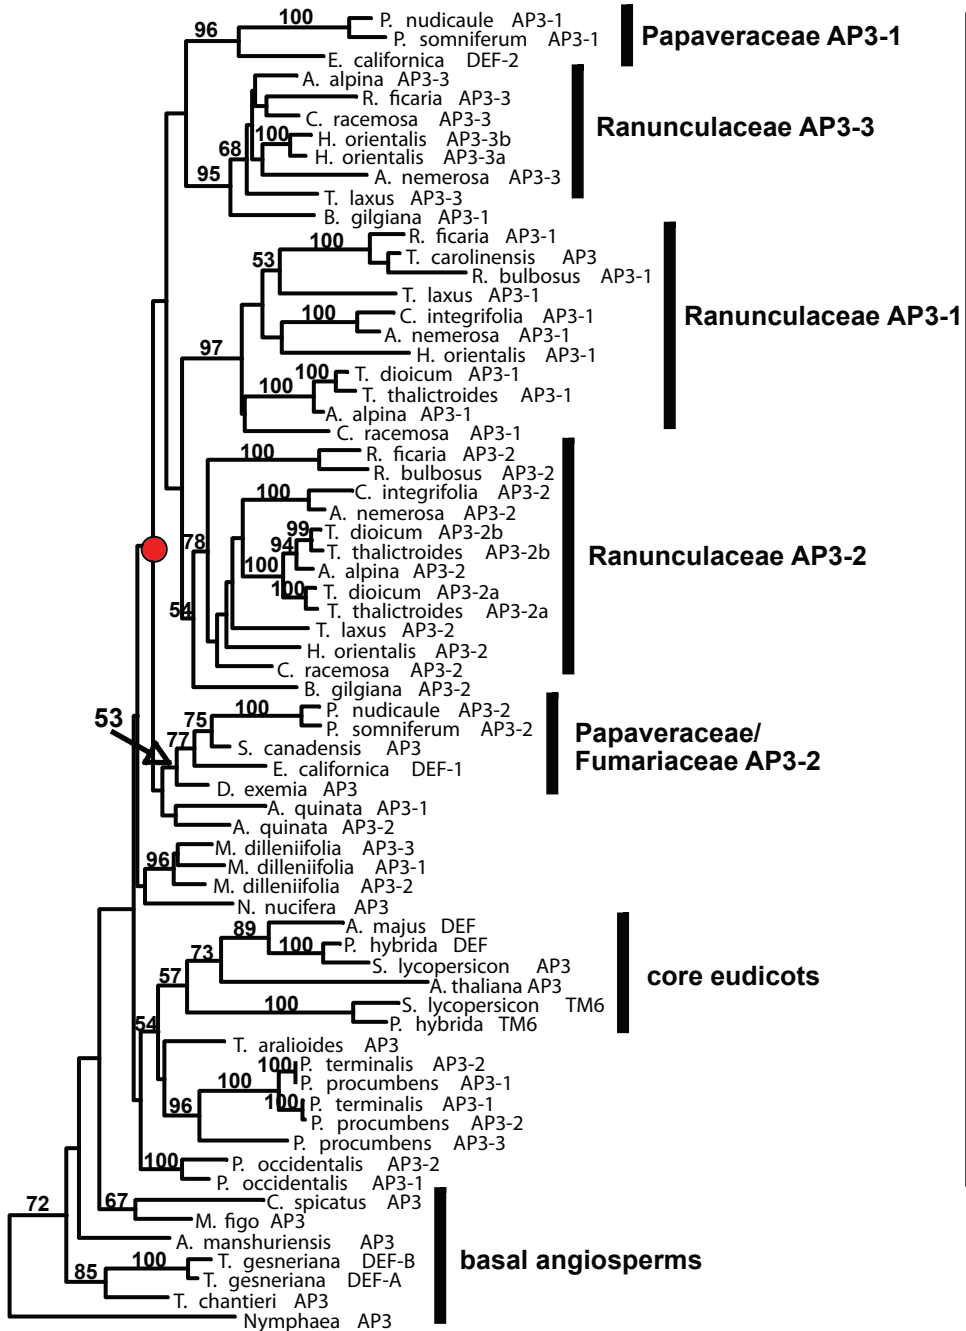

eudicots

Supplement: dev013136-sup-013136-figs1.pdf [file dev013136-sup-013136-figs1.pdf]

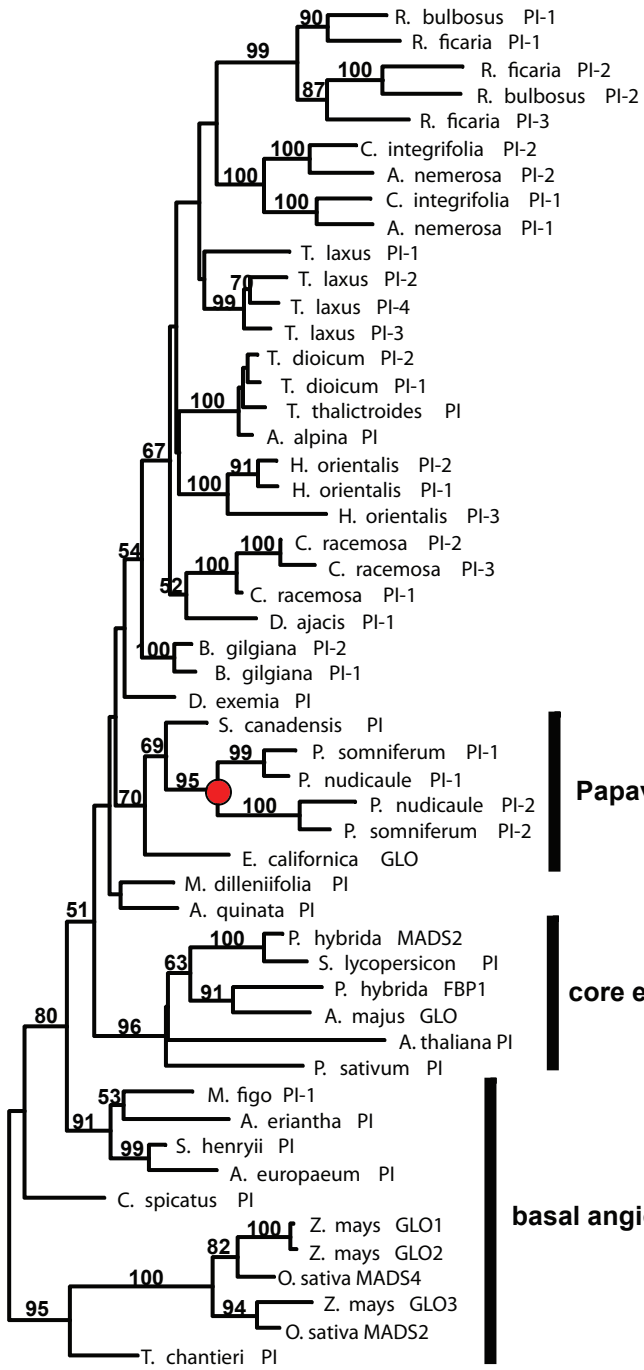

Ranunculaceae PI

Papaveraceae PI

core eudicots

basal angiosperms

eudicots

Supplement: dev013136-sup-013136-figs2.pdf [file dev013136-sup-013136-figs2.pdf]
